# Supplementary material
Source: ML conference proceedings conference paper supplement (https://openreview.net/forum?id=eU87jJyEK5)
Supplement: supplementary_material [file attachment]

## A Appendix material

### A.1 Proof of Theorem 3.1

*Proof.* We can expand  $\mathcal{L}_{sd}(F, A)$  and obtain

$$\begin{aligned}\mathcal{L}_{sd}(F, A) &= \sum_{x, x' \in X} \left( \frac{A_{xx'}}{\sqrt{A_x A_{x'}}} - \mathbf{f}_x^\top \mathbf{f}_{x'} \right)^2 \\ &= \text{const} + \sum_{x, x' \in X} \left( -2A_{xx'} f(x)^\top f(x') + A_x A_{x'} (f(x)^\top f(x'))^2 \right),\end{aligned}\quad (1)$$

where  $\mathbf{f}_x = \sqrt{A_x} f(x)$  is a re-scaled version of  $f(x)$ . At a high level, we follow the proof in [1], while the specific form of loss varies with the different definitions of positive/negative pairs. The form of  $\mathcal{L}_{scl}(f)$  is derived from plugging  $A_{xx'}$  and  $A_x$ .

Recall that  $A_{xx'}$  is defined by

$$A_{xx'} = \alpha \sum_{c_i \in \mathcal{C}} \mathbb{E}_{x \sim \mathcal{P}_{c_i}, x' \sim \mathcal{P}_{c_i}} A_{xx'}^l + \beta \mathbb{E}_{x \sim \mathcal{P}_u, x' \sim \mathcal{P}_u} A_{xx'}, \quad (2)$$

thus we have,

$$\begin{aligned}& -2 \sum_{x, x' \in X} A_{xx'} f(x)^\top f(x') \\ &= -2\alpha \sum_{c_i \in \mathcal{C}} \mathbb{E}_{x \sim \mathcal{P}_{c_i}, x' \sim \mathcal{P}_{c_i}} A_{xx'} f(x)^\top f(x') - 2\beta \mathbb{E}_{x \sim \mathcal{P}_u, x' \sim \mathcal{P}_u} A_{xx'} f(x)^\top f(x') \\ &= -2\alpha \sum_{c_i \in \mathcal{C}} \mathbb{E}_{x \sim \mathcal{P}_{c_i}, x' \sim \mathcal{P}_{c_i}, A_{xx'} \neq 0} f(x)^\top f(x') - 2\beta \mathbb{E}_{x \sim \mathcal{P}_u, x' \sim \mathcal{P}_u, A_{xx'} \neq 0} f(x)^\top f(x') \\ &= -2\alpha \sum_{c_i \in \mathcal{C}} \mathbb{E}_{x \sim \mathcal{P}_{c_i}, x^+ \in \{x' | A_{xx'} \neq 0, x' \sim \mathcal{P}_{c_i}\}} f(x)^\top f(x^+) - 2\beta \mathbb{E}_{x \sim \mathcal{P}_u, x^+ \in \{x' | A_{xx'} \neq 0, x' \sim \mathcal{P}_u\}} f(x)^\top f(x^+) \\ &= -2\alpha \mathcal{L}_1(f) - 2\beta \mathcal{L}_2(f).\end{aligned}$$

The penultimate equation is derived from the following lemma:

$$\begin{aligned}\mathcal{L}_{sd}(F) &= \mathcal{L}(f) + \text{const} \\ \text{where } \mathcal{L}(f) &\triangleq -2 \cdot \mathbb{E}_{x, x^+} [f(x)^\top f(x^+)] + \mathbb{E}_{x, x^-} [(f(x)^\top f(x^-))^2].\end{aligned}\quad (3)$$

Recall that  $A_x$  is given by

$$A_x = \sum_{x' \in X} A_{xx'} \quad (4)$$

$$= \alpha \sum_{c_i \in \mathcal{C}} \mathbb{E}_{x \sim \mathcal{P}_{c_i}} A_x + \beta \mathbb{E}_{x \sim \mathcal{P}_u} A_x. \quad (5)$$

thus plugging  $A_x$  and  $A_{x'}$  we have,

$$\begin{aligned}
& \sum_{x, x' \in X} A_x A_{x'} (f(x)^\top f(x'))^2 \\
&= \sum_{x, x' \in X} \left( \alpha \sum_{c_i \in \mathcal{C}} \mathbb{E}_{x \sim \mathcal{P}_{c_i}} A_x + \beta \mathbb{E}_{x \sim \mathcal{P}_u} A_x \right) \cdot \left( \alpha \sum_{c_j \in \mathcal{C}} \mathbb{E}_{x' \sim \mathcal{P}_{c_j}} A_{x'} + \beta \mathbb{E}_{x' \sim \mathcal{P}_u} A_{x'} \right) (f(x)^\top f(x'))^2 \\
&= \alpha^2 \sum_{x, x' \in X} \sum_{c_i \in \mathcal{C}} \mathbb{E}_{x \sim \mathcal{P}_{c_i}} A_x \sum_{c_j \in \mathcal{C}} \mathbb{E}_{x' \sim \mathcal{P}_{c_j}} A_{x'} (f(x)^\top f(x'))^2 \\
&\quad + 2\alpha\beta \sum_{x, x' \in X} \sum_{c_i \in \mathcal{C}} \mathbb{E}_{x \sim \mathcal{P}_{c_i}} A_x \mathbb{E}_{x' \sim \mathcal{P}_u} A_{x'} (f(x)^\top f(x'))^2 \\
&\quad + \beta^2 \sum_{x, x' \in X} \mathbb{E}_{x \sim \mathcal{P}_u} A_x \mathbb{E}_{x' \sim \mathcal{P}_u} A_{x'} (f(x)^\top f(x'))^2 \\
&= \alpha^2 \sum_{c_i \in \mathcal{C}} \sum_{c_j \in \mathcal{C}} \mathbb{E}_{x \sim \mathcal{P}_{c_i}, x^- \in \{x' | A_{xx'}=0, x' \sim \mathcal{P}_{c_j}\}} [(f(x)^\top f(x'))^2] \\
&\quad + 2\alpha\beta \sum_{c_i \in \mathcal{C}} \mathbb{E}_{x \sim \mathcal{P}_{c_i}, x^- \in \{x' | A_{xx'}=0, x' \sim \mathcal{P}_u\}} [(f(x)^\top f(x'))^2] \\
&\quad + \beta^2 \mathbb{E}_{x \sim \mathcal{P}_u, x^- \in \{x' | A_{xx'}=0, x' \sim \mathcal{P}_u\}} [(f(x)^\top f(x'))^2] \\
&= \alpha^2 \mathcal{L}_3(f) + 2\alpha\beta \mathcal{L}_4(f) + \beta^2 \mathcal{L}_5(f).
\end{aligned}$$

□

The proof of Theorem 3.1 is finished.

## A.2 Additional Experiments

### A.2.1 Zero-shot node classification for large-scale data

For SpeAr, the spectral contrastive loss computes the similarities between samples, with a time complexity of  $O(N_s N_s^+ + N_u N_u^+ + N_s N_u + N_s N_s^- + N_u N_u^-)$ . Let  $N_s$  be the count of labeled nodes,  $N_s^+$  be the count of positive nodes of labeled nodes, and  $N_s^-$  the negative nodes.  $N_u$  is the count of unlabeled nodes, with  $N_u^+$  and  $N_u^-$  representing the count of positive and negative nodes, respectively. This complexity reveals a substantial demand for computational resources, presenting a notable challenge for processing large-scale graph data.

Following GraphCEN [2], we validate the efficacy of the SpeAr on large-scale dataset, such as ogbn-arxiv [3]. Ogbn-arxiv has 169343 nodes, and 2484941 edges. The feature dimension is 128 and the total class number is 40. Class split I is [20/0/20], 20 seen classes as training set, 20 unseen classes as testing set. Class split II is [13/13/14], 13 seen classes as training set, 13 unseen classes as validation set, and 14 unseen classes as testing set. Confronted with memory limitations, we adopt a multi-round subgraph extraction strategy. Specifically, in each round, we extract subgraphs that encompass both seen and unseen class nodes and execute the SpeAr algorithm on these subgraphs. Through this iterative process of extraction, we aim to progressively accumulate performance gains that mirror the execution of SpeAr on the entire graph, all while maintaining computational efficiency. As shown in Table 1, our proposed method SpeAr shows significant improvement in performance metrics compared to existing methods. The comparative analysis in the table highlights the superiority of our method in capturing class-discriminative information in graph structures.

Table 1: A comparative performance analysis of DGPn, DBiGCN, and ours SpeAr for zero-shot node classification on ogbn-arxiv. (%)

|                | DGPn  | DBiGCN | GraphCEN | SpeAr(Ours)  |
|----------------|-------|--------|----------|--------------|
| Class Split I  | 22.37 | 21.40  | 23.96    | <b>30.45</b> |
| Class Split II | 21.95 | 25.92  | 28.36    | <b>32.20</b> |

Table 2: The Comparison of zero-shot node classification accuracy (%) using the different CSDs.

|                | Cora         |              |              | Citeseer     |              |              | C-M10M       |              |              |
|----------------|--------------|--------------|--------------|--------------|--------------|--------------|--------------|--------------|--------------|
|                | TEXT         | LABEL        | Decline rate | TEXT         | LABEL        | Decline rate | TEXT         | LABEL        | Decline rate |
| DAP            | 26.56        | 25.34        | -4.59 %      | 34.01        | 30.01        | -11.76%      | 38.71        | 32.67        | -15.60%      |
| ESZSL          | 27.35        | 25.79        | -5.70%       | 30.32        | 28.52        | -5.94%       | 37.00        | 35.02        | -5.35%       |
| ZS-GCN         | 25.73        | 23.73        | -7.77%       | 28.62        | 26.11        | -8.77%       | 37.89        | 33.32        | -12.06%      |
| WDVSc          | 30.62        | 18.73        | -38.83%      | 23.46        | 19.70        | -16.02%      | 38.12        | 30.82        | -19.15%      |
| Hyperbolic-ZSL | 26.36        | 25.47        | -3.38%       | 34.18        | 21.04        | -38.44%      | 35.80        | 34.49        | -3.66%       |
| DGPN           | 33.78        | 32.55        | -3.64%       | 38.02        | 31.83        | -16.28%      | 41.98        | 35.05        | -16.51%      |
| DBiGCN         | 45.14        | 39.05        | -13.49%      | 40.97        | 39.10        | -3.10%       | 45.45        | 43.71        | -3.83%       |
| SpeAr(Ours)    | <b>60.48</b> | <b>49.52</b> | -18.12%      | <b>59.72</b> | <b>48.88</b> | -18.15%      | <b>54.22</b> | <b>47.05</b> | -13.22%      |

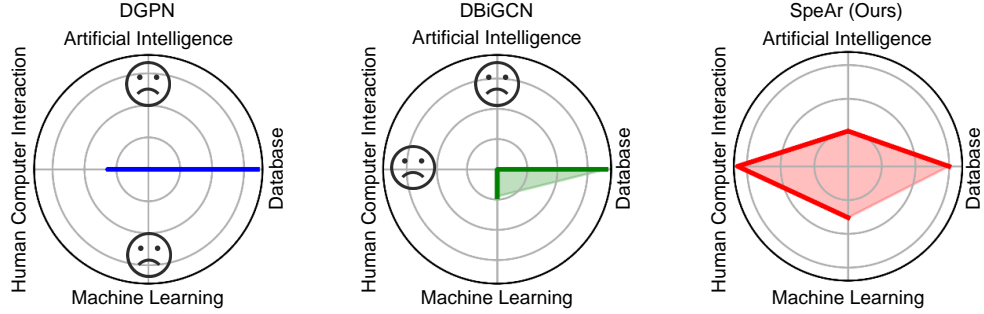

Figure 1: An example of the SpeAr model’s effectiveness in mitigating prediction bias on Citeseer.

### A.2.2 Discussion on Different CSVs

The impact of external knowledge from different sources on model outcomes is significantly varied. In Table 2, we individually examined the effects of LABEL-based CSVs and TEXT-based CSVs as external knowledge. Given that TEXT data encapsulates a richer set of categorical information, the SpeAr model utilizing text-based CSVs demonstrates superior performance. Indeed, when employing LABEL-based CSVs as the input external knowledge, SpeAr also outperforms existing methods, further corroborating the efficacy of the spectral contrastive loss and prototype updating mechanisms proposed in this paper for excavating and identifying categories on graphs. This series of results underscore that our approach significantly enhances the discriminability between different classes, thereby elevating the model’s overall recognition capability.

### A.2.3 Discussion on SpeAr model’s effectiveness in mitigating prediction bias

We verify the benefits of SpeAr in mitigating prediction bias on the dataset Citeseer. As shown in Figure 1, the recall for certain classes is extremely low or even zero. For instance, the unseen classes “Human Computer Interaction” and “Artificial Intelligence” exhibit a zero recall rate when predicted by the DBiGCN. In contrast, the SpeAr model provides more accurate classification outcomes for all unseen classes.

## B Limitation

Although the SpeAr model shows excellent performance on the ZNC task, its relatively high computational complexity may become a challenge when dealing with large-scale graph data. Especially in application scenarios with limited resources or high real-time requirements, the high computational cost may limit the usefulness of the model. Therefore, we effectively alleviate this problem by adopting the strategy of multi-round subgraph training. The model can gradually learn and integrate information from different subgraphs, thus realizing effective processing of large graph data while maintaining computational efficiency.

## C Experiments Compute Resources

Computation resources: We execute our code on a computer with NVIDIA GeForce RTX 3090 (GPU) and Intel Xeon Gold 6254 (CPU).

## D Societal Impacts

The introduction of SpeAr has made a significant contribution to the advancement of zero-shot node classification tasks. It demonstrates tremendous potential in the field of data analysis, aiding researchers in uncovering new insights and knowledge. There are no negative societal impacts on our work.

## References

- [1] Jeff Z. HaoChen, Colin Wei, Adrien Gaidon, and Tengyu Ma. Provable guarantees for self-supervised deep learning with spectral contrastive loss. In *Advances in Neural Information Processing Systems*, volume 34, pages 5000–5011, 2021.
- [2] Wei Ju, Yifang Qin, Siyu Yi, Zhengyang Mao, Kangjie Zheng, Luchen Liu, Xiao Luo, and Ming Zhang. Zero-shot node classification with graph contrastive embedding network. *Transactions on Machine Learning Research*, 2023.
- [3] Kuansan Wang, Zhihong Shen, Chiyuan Huang, Chieh-Han Wu, Yuxiao Dong, and Anshul Kanakia. Microsoft academic graph: When experts are not enough. *Quantitative Science Studies*, 1(1):396–413, 2020.

## NeurIPS Paper Checklist

### 1. Claims

Question: Do the main claims made in the abstract and introduction accurately reflect the paper's contributions and scope?

Answer: [\[Yes\]](#)

Justification: Both the abstract and introduction include the claims made in the paper.

Guidelines:

- The answer NA means that the abstract and introduction do not include the claims made in the paper.
- The abstract and/or introduction should clearly state the claims made, including the contributions made in the paper and important assumptions and limitations. A No or NA answer to this question will not be perceived well by the reviewers.
- The claims made should match theoretical and experimental results, and reflect how much the results can be expected to generalize to other settings.
- It is fine to include aspirational goals as motivation as long as it is clear that these goals are not attained by the paper.

### 2. Limitations

Question: Does the paper discuss the limitations of the work performed by the authors?

Answer: [\[Yes\]](#)

Justification: We discuss the limitations of the proposed method in terms of time complexity, see Appendix B.

Guidelines:

- The answer NA means that the paper has no limitation while the answer No means that the paper has limitations, but those are not discussed in the paper.
- The authors are encouraged to create a separate "Limitations" section in their paper.
- The paper should point out any strong assumptions and how robust the results are to violations of these assumptions (e.g., independence assumptions, noiseless settings, model well-specification, asymptotic approximations only holding locally). The authors should reflect on how these assumptions might be violated in practice and what the implications would be.
- The authors should reflect on the scope of the claims made, e.g., if the approach was only tested on a few datasets or with a few runs. In general, empirical results often depend on implicit assumptions, which should be articulated.
- The authors should reflect on the factors that influence the performance of the approach. For example, a facial recognition algorithm may perform poorly when image resolution is low or images are taken in low lighting. Or a speech-to-text system might not be used reliably to provide closed captions for online lectures because it fails to handle technical jargon.
- The authors should discuss the computational efficiency of the proposed algorithms and how they scale with dataset size.
- If applicable, the authors should discuss possible limitations of their approach to address problems of privacy and fairness.
- While the authors might fear that complete honesty about limitations might be used by reviewers as grounds for rejection, a worse outcome might be that reviewers discover limitations that aren't acknowledged in the paper. The authors should use their best judgment and recognize that individual actions in favor of transparency play an important role in developing norms that preserve the integrity of the community. Reviewers will be specifically instructed to not penalize honesty concerning limitations.

### 3. Theory Assumptions and Proofs

Question: For each theoretical result, does the paper provide the full set of assumptions and a complete (and correct) proof?

Answer: [\[Yes\]](#)

Justification: This paper provide the full set of assumptions and a complete (and correct) proof. This paper proposes Theorem 3.1 in Subsection 3.3 and a complete proof in Appendix A.1.

Guidelines:

- The answer NA means that the paper does not include theoretical results.
- All the theorems, formulas, and proofs in the paper should be numbered and cross-referenced.
- All assumptions should be clearly stated or referenced in the statement of any theorems.
- The proofs can either appear in the main paper or the supplemental material, but if they appear in the supplemental material, the authors are encouraged to provide a short proof sketch to provide intuition.
- Inversely, any informal proof provided in the core of the paper should be complemented by formal proofs provided in appendix or supplemental material.
- Theorems and Lemmas that the proof relies upon should be properly referenced.

#### 4. Experimental Result Reproducibility

Question: Does the paper fully disclose all the information needed to reproduce the main experimental results of the paper to the extent that it affects the main claims and/or conclusions of the paper (regardless of whether the code and data are provided or not)?

Answer: [\[Yes\]](#)

Justification: We provide details of the algorithm and its implementation in Section 3 and 4.

Guidelines:

- The answer NA means that the paper does not include experiments.
- If the paper includes experiments, a No answer to this question will not be perceived well by the reviewers: Making the paper reproducible is important, regardless of whether the code and data are provided or not.
- If the contribution is a dataset and/or model, the authors should describe the steps taken to make their results reproducible or verifiable.
- Depending on the contribution, reproducibility can be accomplished in various ways. For example, if the contribution is a novel architecture, describing the architecture fully might suffice, or if the contribution is a specific model and empirical evaluation, it may be necessary to either make it possible for others to replicate the model with the same dataset, or provide access to the model. In general, releasing code and data is often one good way to accomplish this, but reproducibility can also be provided via detailed instructions for how to replicate the results, access to a hosted model (e.g., in the case of a large language model), releasing of a model checkpoint, or other means that are appropriate to the research performed.
- While NeurIPS does not require releasing code, the conference does require all submissions to provide some reasonable avenue for reproducibility, which may depend on the nature of the contribution. For example
  - (a) If the contribution is primarily a new algorithm, the paper should make it clear how to reproduce that algorithm.
  - (b) If the contribution is primarily a new model architecture, the paper should describe the architecture clearly and fully.
  - (c) If the contribution is a new model (e.g., a large language model), then there should either be a way to access this model for reproducing the results or a way to reproduce the model (e.g., with an open-source dataset or instructions for how to construct the dataset).
  - (d) We recognize that reproducibility may be tricky in some cases, in which case authors are welcome to describe the particular way they provide for reproducibility. In the case of closed-source models, it may be that access to the model is limited in some way (e.g., to registered users), but it should be possible for other researchers to have some path to reproducing or verifying the results.

#### 5. Open access to data and code

Question: Does the paper provide open access to the data and code, with sufficient instructions to faithfully reproduce the main experimental results, as described in supplemental material?

Answer: [Yes]

Justification: We provide the relevant code at github.

Guidelines:

- The answer NA means that paper does not include experiments requiring code.
- Please see the NeurIPS code and data submission guidelines (<https://nips.cc/public/guides/CodeSubmissionPolicy>) for more details.
- While we encourage the release of code and data, we understand that this might not be possible, so “No” is an acceptable answer. Papers cannot be rejected simply for not including code, unless this is central to the contribution (e.g., for a new open-source benchmark).
- The instructions should contain the exact command and environment needed to run to reproduce the results. See the NeurIPS code and data submission guidelines (<https://nips.cc/public/guides/CodeSubmissionPolicy>) for more details.
- The authors should provide instructions on data access and preparation, including how to access the raw data, preprocessed data, intermediate data, and generated data, etc.
- The authors should provide scripts to reproduce all experimental results for the new proposed method and baselines. If only a subset of experiments are reproducible, they should state which ones are omitted from the script and why.
- At submission time, to preserve anonymity, the authors should release anonymized versions (if applicable).
- Providing as much information as possible in supplemental material (appended to the paper) is recommended, but including URLs to data and code is permitted.

## 6. Experimental Setting/Details

Question: Does the paper specify all the training and test details (e.g., data splits, hyperparameters, how they were chosen, type of optimizer, etc.) necessary to understand the results?

Answer: [Yes]

Justification: This paper gives all the training and test details in Subsection 4.1.

Guidelines:

- The answer NA means that the paper does not include experiments.
- The experimental setting should be presented in the core of the paper to a level of detail that is necessary to appreciate the results and make sense of them.
- The full details can be provided either with the code, in appendix, or as supplemental material.

## 7. Experiment Statistical Significance

Question: Does the paper report error bars suitably and correctly defined or other appropriate information about the statistical significance of the experiments?

Answer: [Yes]

Justification: This paper reports the zero-shot node classification precision, generalized zero-shot classification results  $H$  in Subsection 4.2, and class recall for the Cora dataset in Subsection 4.5.

Guidelines:

- The answer NA means that the paper does not include experiments.
- The authors should answer "Yes" if the results are accompanied by error bars, confidence intervals, or statistical significance tests, at least for the experiments that support the main claims of the paper.
- The factors of variability that the error bars are capturing should be clearly stated (for example, train/test split, initialization, random drawing of some parameter, or overall run with given experimental conditions).

- The method for calculating the error bars should be explained (closed form formula, call to a library function, bootstrap, etc.)
- The assumptions made should be given (e.g., Normally distributed errors).
- It should be clear whether the error bar is the standard deviation or the standard error of the mean.
- It is OK to report 1-sigma error bars, but one should state it. The authors should preferably report a 2-sigma error bar than state that they have a 96% CI, if the hypothesis of Normality of errors is not verified.
- For asymmetric distributions, the authors should be careful not to show in tables or figures symmetric error bars that would yield results that are out of range (e.g. negative error rates).
- If error bars are reported in tables or plots, The authors should explain in the text how they were calculated and reference the corresponding figures or tables in the text.

## 8. Experiments Compute Resources

Question: For each experiment, does the paper provide sufficient information on the computer resources (type of compute workers, memory, time of execution) needed to reproduce the experiments?

Answer: [Yes]

Justification: We provide the experiments compute resources of our work in Appendix C.

Guidelines:

- The answer NA means that the paper does not include experiments.
- The paper should indicate the type of compute workers CPU or GPU, internal cluster, or cloud provider, including relevant memory and storage.
- The paper should provide the amount of compute required for each of the individual experimental runs as well as estimate the total compute.
- The paper should disclose whether the full research project required more compute than the experiments reported in the paper (e.g., preliminary or failed experiments that didn't make it into the paper).

## 9. Code Of Ethics

Question: Does the research conducted in the paper conform, in every respect, with the NeurIPS Code of Ethics <https://neurips.cc/public/EthicsGuidelines>?

Answer: [Yes]

Justification: The research conducted in the paper conform, in every respect, with the NeurIPS Code of Ethics.

Guidelines:

- The answer NA means that the authors have not reviewed the NeurIPS Code of Ethics.
- If the authors answer No, they should explain the special circumstances that require a deviation from the Code of Ethics.
- The authors should make sure to preserve anonymity (e.g., if there is a special consideration due to laws or regulations in their jurisdiction).

## 10. Broader Impacts

Question: Does the paper discuss both potential positive societal impacts and negative societal impacts of the work performed?

Answer: [Yes]

Justification: The paper discusses both potential positive societal impacts and negative societal impacts of the work performed in Appendix D.

Guidelines:

- The answer NA means that there is no societal impact of the work performed.
- If the authors answer NA or No, they should explain why their work has no societal impact or why the paper does not address societal impact.



- Examples of negative societal impacts include potential malicious or unintended uses (e.g., disinformation, generating fake profiles, surveillance), fairness considerations (e.g., deployment of technologies that could make decisions that unfairly impact specific groups), privacy considerations, and security considerations.
- The conference expects that many papers will be foundational research and not tied to particular applications, let alone deployments. However, if there is a direct path to any negative applications, the authors should point it out. For example, it is legitimate to point out that an improvement in the quality of generative models could be used to generate deepfakes for disinformation. On the other hand, it is not needed to point out that a generic algorithm for optimizing neural networks could enable people to train models that generate Deepfakes faster.
- The authors should consider possible harms that could arise when the technology is being used as intended and functioning correctly, harms that could arise when the technology is being used as intended but gives incorrect results, and harms following from (intentional or unintentional) misuse of the technology.
- If there are negative societal impacts, the authors could also discuss possible mitigation strategies (e.g., gated release of models, providing defenses in addition to attacks, mechanisms for monitoring misuse, mechanisms to monitor how a system learns from feedback over time, improving the efficiency and accessibility of ML).

#### 11. Safeguards

Question: Does the paper describe safeguards that have been put in place for responsible release of data or models that have a high risk for misuse (e.g., pretrained language models, image generators, or scraped datasets)?

Answer: [NA]

Justification: The paper poses no such risks.

Guidelines:

- The answer NA means that the paper poses no such risks.
- Released models that have a high risk for misuse or dual-use should be released with necessary safeguards to allow for controlled use of the model, for example by requiring that users adhere to usage guidelines or restrictions to access the model or implementing safety filters.
- Datasets that have been scraped from the Internet could pose safety risks. The authors should describe how they avoided releasing unsafe images.
- We recognize that providing effective safeguards is challenging, and many papers do not require this, but we encourage authors to take this into account and make a best faith effort.

#### 12. Licenses for existing assets

Question: Are the creators or original owners of assets (e.g., code, data, models), used in the paper, properly credited and are the license and terms of use explicitly mentioned and properly respected?

Answer: [Yes]

Justification: We cite the original paper that produced the code package.

Guidelines:

- The answer NA means that the paper does not use existing assets.
- The authors should cite the original paper that produced the code package or dataset.
- The authors should state which version of the asset is used and, if possible, include a URL.
- The name of the license (e.g., CC-BY 4.0) should be included for each asset.
- For scraped data from a particular source (e.g., website), the copyright and terms of service of that source should be provided.
- If assets are released, the license, copyright information, and terms of use in the package should be provided. For popular datasets, [paperswithcode.com/datasets](https://paperswithcode.com/datasets) has curated licenses for some datasets. Their licensing guide can help determine the license of a dataset.

- For existing datasets that are re-packaged, both the original license and the license of the derived asset (if it has changed) should be provided.
- If this information is not available online, the authors are encouraged to reach out to the asset's creators.

### 13. **New Assets**

Question: Are new assets introduced in the paper well documented and is the documentation provided alongside the assets?

Answer: [\[Yes\]](#)

Justification: We provide details of new assets.

Guidelines:

- The answer NA means that the paper does not release new assets.
- Researchers should communicate the details of the dataset/code/model as part of their submissions via structured templates. This includes details about training, license, limitations, etc.
- The paper should discuss whether and how consent was obtained from people whose asset is used.
- At submission time, remember to anonymize your assets (if applicable). You can either create an anonymized URL or include an anonymized zip file.

### 14. **Crowdsourcing and Research with Human Subjects**

Question: For crowdsourcing experiments and research with human subjects, does the paper include the full text of instructions given to participants and screenshots, if applicable, as well as details about compensation (if any)?

Answer: [\[NA\]](#)

Justification: The paper does not involve crowdsourcing nor research with human subjects.

Guidelines:

- The answer NA means that the paper does not involve crowdsourcing nor research with human subjects.
- Including this information in the supplemental material is fine, but if the main contribution of the paper involves human subjects, then as much detail as possible should be included in the main paper.
- According to the NeurIPS Code of Ethics, workers involved in data collection, curation, or other labor should be paid at least the minimum wage in the country of the data collector.

### 15. **Institutional Review Board (IRB) Approvals or Equivalent for Research with Human Subjects**

Question: Does the paper describe potential risks incurred by study participants, whether such risks were disclosed to the subjects, and whether Institutional Review Board (IRB) approvals (or an equivalent approval/review based on the requirements of your country or institution) were obtained?

Answer: [\[NA\]](#)

Justification: The paper does not involve crowdsourcing nor research with human subjects.

Guidelines:

- The answer NA means that the paper does not involve crowdsourcing nor research with human subjects.
- Depending on the country in which research is conducted, IRB approval (or equivalent) may be required for any human subjects research. If you obtained IRB approval, you should clearly state this in the paper.
- We recognize that the procedures for this may vary significantly between institutions and locations, and we expect authors to adhere to the NeurIPS Code of Ethics and the guidelines for their institution.
- For initial submissions, do not include any information that would break anonymity (if applicable), such as the institution conducting the review.
